# Supplementary material for: Optimization of a quantitative protocol for the intermediate metabolites of the glycolysis pathway in human serum using gas chromatography–mass spectrometry
Source: Royal Society of Chemistry journal article supplement (doi:10.1039/d2nj06053a), 2023-01-01
Supplement: d2nj06053a1.pdf [file d2nj06053a1.pdf]

## **Electronic supplementary information (ESI)**

### **Optimization of the quantitative protocol for the intermediate metabolites of the glycolysis pathway in human serum using gas chromatography-mass spectrometry**

Ying-Shu Tang, Ming-Jia Zhang, Jin-Hui Zhao, Li-Yan Liu \*

Department of Nutrition and Food Hygiene, Public Health College, Harbin Medical University, Harbin, P. R. China.

\* To whom correspondence should be addressed. Liyan Liu, E-mail: yanziliu2100@163.com. Department of Nutrition and Food Hygiene, Public Health College, Harbin Medical University, 157 Baojian Road, Nan gang District, Harbin, P. R. China, 150086.

Tel: +86 0451 87502725; Fax: +86 0451 87502885.

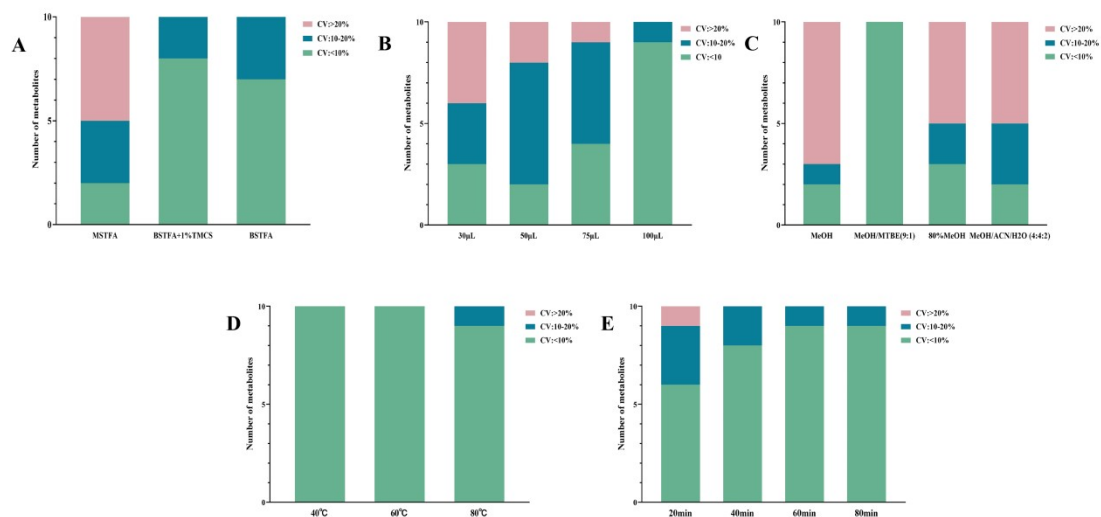

**Fig. S1** CV% results of different conditions in the mixed solution of standard and BSA. Note: (A) The different derivatization reagents. (B) The derivatization solvent volume. (C) The extraction solvent. (D) The reaction temperature. (E) The reaction time.

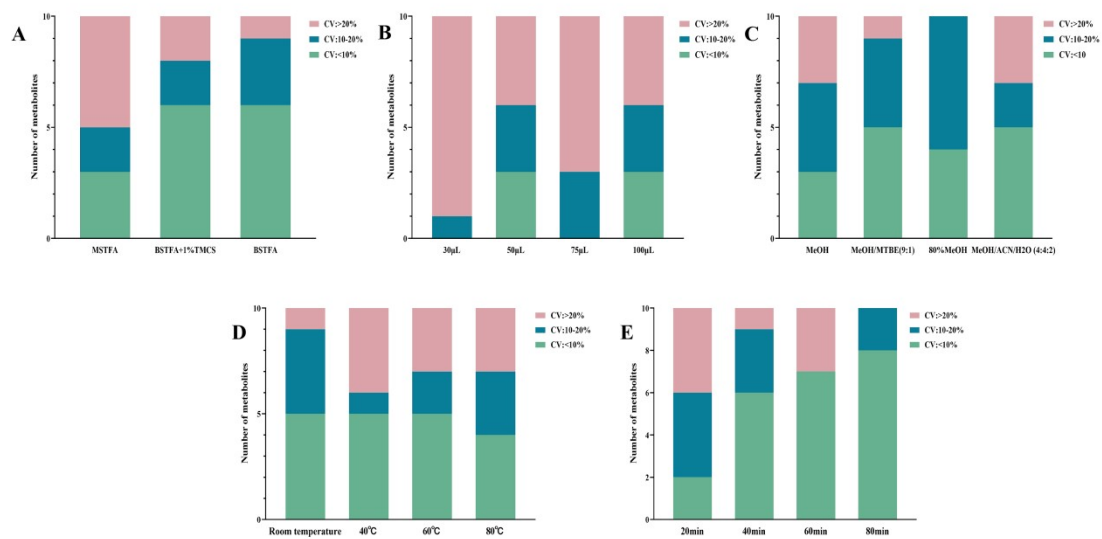

**Fig. S2** CV% results of different conditions in serum sample. Note: (A) The different derivatization reagents. (B) The derivatization solvent volume. (C) The extraction solvent. (D) The reaction temperature. (E) The reaction time.

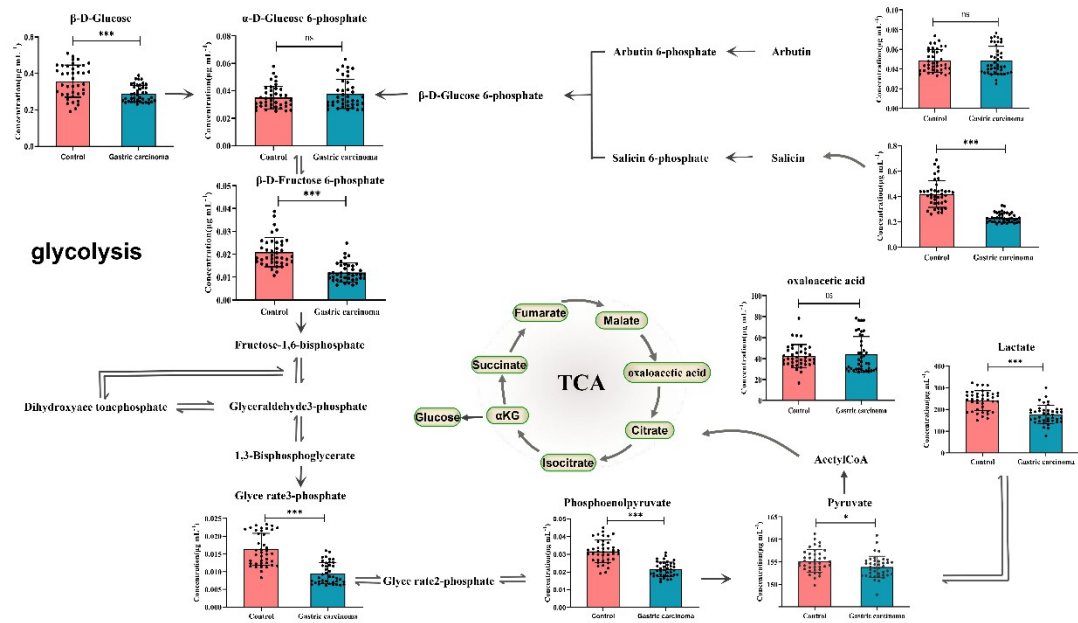

**Fig. S3** Comparison of glycolysis metabolites in healthy controls and gastric cancer group. P-values were obtained from paired sample T test. nsP>0.05, \*P < 0.05, \*\*P < 0.01, and \*\*\*P < 0.001.

**Table S1** The ion pairs of glycolysis metabolites for SRM mode.

| Glycolysis metabolites          | Retention time (min) | Precursor ion (m/z) | Product ion (m/z) | Collision energy (eV) |
|---------------------------------|----------------------|---------------------|-------------------|-----------------------|
| Pyruvate                        | 5.45                 | 89                  | 59                | 18                    |
| Lactate                         | 5.61                 | 191.1               | 147               | 24                    |
| Oxaloacetic acid                | 11.47                | 202.1               | 133               | 36                    |
| Phosphoenolpyruvate             | 13.96                | 369.1               | 147               | 16                    |
| $\beta$ -D-Glucose              | 15.60                | 204.1               | 73                | 12                    |
| Glyceraldehyde 3-phosphate      | 16.99                | 227                 | 211               | 8                     |
| $\beta$ -D-Fructose 6-phosphate | 22.70                | 315.1               | 299               | 10                    |
| $\alpha$ -D-Glucose 6-phosphate | 23.75                | 387.1               | 225               | 30                    |
| Salicin                         | 25.65                | 169                 | 73                | 12                    |
| Arbutin                         | 26.22                | 254.1               | 239.1             | 14                    |

**Table S2** Experimental design, independent factors, levels of pretreatment process.

| Run | A: The derivatization solvent volume ( $\mu\text{L}$ ) | B: The reaction temperature ( $^{\circ}\text{C}$ ) | C: The reaction time (min) | D: The extraction solvent |
|-----|--------------------------------------------------------|----------------------------------------------------|----------------------------|---------------------------|
| 1   | 50                                                     | 80                                                 | 60                         | 80%MeOH                   |
| 2   | 30                                                     | 20                                                 | 80                         | 80%MeOH                   |
| 3   | 75                                                     | 40                                                 | 60                         | MeOH:MTBE(v:v 9:1)        |
| 4   | 75                                                     | 40                                                 | 40                         | MeOH                      |
| 5   | 75                                                     | 80                                                 | 20                         | MeOH:MTBE(v:v 9:1)        |
| 6   | 30                                                     | 60                                                 | 40                         | MeOH:MTBE(v:v 9:1)        |
| 7   | 75                                                     | 60                                                 | 40                         | MeOH:MTBE(v:v 9:1)        |
| 8   | 100                                                    | 40                                                 | 20                         | MeOH                      |
| 9   | 50                                                     | 20                                                 | 20                         | MeOH:MTBE(v:v 9:1)        |
| 10  | 50                                                     | 60                                                 | 80                         | MeOH                      |
| 11  | 100                                                    | 20                                                 | 40                         | 80%MeOH                   |
| 12  | 30                                                     | 80                                                 | 80                         | MeOH:MTBE(v:v 9:1)        |
| 13  | 100                                                    | 80                                                 | 20                         | 80%MeOH                   |
| 14  | 75                                                     | 40                                                 | 60                         | MeOH:MTBE(v:v 9:1)        |
| 15  | 50                                                     | 20                                                 | 20                         | MeOH:MTBE(v:v 9:1)        |
| 16  | 100                                                    | 80                                                 | 60                         | MeOH                      |
| 17  | 100                                                    | 20                                                 | 80                         | MeOH                      |
| 18  | 50                                                     | 60                                                 | 80                         | MeOH                      |
| 19  | 100                                                    | 60                                                 | 80                         | 80%MeOH                   |
| 20  | 30                                                     | 20                                                 | 60                         | MeOH                      |
| 21  | 30                                                     | 80                                                 | 20                         | MeOH                      |
| 22  | 50                                                     | 80                                                 | 60                         | 80%MeOH                   |
| 23  | 75                                                     | 40                                                 | 60                         | MeOH:MTBE(v:v 9:1)        |
| 24  | 30                                                     | 40                                                 | 20                         | 80%MeOH                   |
| 25  | 30                                                     | 60                                                 | 40                         | MeOH:MTBE(v:v 9:1)        |

**Table S3** Demographic and clinical chemistry characteristics of 80 subjects (Mean  $\pm$  SD).

| Parameters             | Control (n=40)     | Gastric carcinoma (n=40) |
|------------------------|--------------------|--------------------------|
| Age, years             | 61.60 $\pm$ 9.00   | 58.30 $\pm$ 9.51         |
| Sex, F/M               | 15/25              | 10/30                    |
| Height, cm             | 165.51 $\pm$ 8.00  | 167.78 $\pm$ 8.50        |
| Weight, kg             | 65.64 $\pm$ 10.14  | 66.48 $\pm$ 8.92         |
| Waistline, cm          | 83.40 $\pm$ 5.55   | 84.05 $\pm$ 5.32         |
| BMI, kg/m <sup>2</sup> | 23.83 $\pm$ 2.37   | 23.56 $\pm$ 2.20         |
| DBP, mmHg              | 76.75 $\pm$ 9.62   | 78.95 $\pm$ 12.69        |
| SBP, mmHg              | 128.75 $\pm$ 16.53 | 128.35 $\pm$ 20.53       |
| ALT, U/L               | 14.65 $\pm$ 9.74   | 9.93 $\pm$ 7.17          |
| AST, U/L               | 25.05 $\pm$ 18.85  | 17.05 $\pm$ 16.71        |
| TBIL, $\mu$ mol/L      | 16.27 $\pm$ 3.58   | 14.45 $\pm$ 3.68         |
| BUN, mmol/L            | 6.37 $\pm$ 1.39    | 6.22 $\pm$ 1.33          |
| CRE, $\mu$ mol/l       | 71.05 $\pm$ 21.85  | 78.70 $\pm$ 20.78        |
| TG, mmol/L             | 1.36 $\pm$ 0.94    | 1.35 $\pm$ 0.73          |
| CHO, mmol/L            | 3.63 $\pm$ 0.70    | 5.03 $\pm$ 1.72          |
| HDL-C, mmol/L          | 0.73 $\pm$ 0.27    | 0.96 $\pm$ 0.27          |
| LDL-C, mmol/L          | 1.90 $\pm$ 0.67    | 3.17 $\pm$ 1.28          |
| GLU, mmol/L            | 6.50 $\pm$ 2.03    | 5.07 $\pm$ 0.97          |

Note: SBP: systolic blood pressure, DBP: diastolic blood pressure, BMI: body mass index, TG: triglycerides, AST: aspartate aminotransferase, ALT: cereal third transaminase, TBIL: total bilirubin, BUN: blood urea nitrogen, CRE: serum creatinine, CHO: total cholesterol, HDL-C: high density lipotein cholesterol, LDL-C: low density lipoprotein cholesterol, GLU: blood glucose.

**Table S4** The model coefficients computed based on radial basis functions with derivative reactions of the mixed solution of standard and BSA and serum sample.

| The mixed solution of standard and BSA |                |             | Serum sample             |                |             |
|----------------------------------------|----------------|-------------|--------------------------|----------------|-------------|
| Glycolysis metabolites                 | R <sup>2</sup> | Lack of fit | Glycolysis metabolites   | R <sup>2</sup> | Lack of fit |
| Pyruvate                               | 0.9352         | 0.2219      | Pyruvate                 | 0.9403         | 0.2219      |
| Lactate                                | 0.9767         | 0.0075      | Lactate                  | 0.8315         | 0.0075      |
| oxaloacetic acid                       | 0.7647         | 0.2357      | oxaloacetic acid         | 0.9471         | 0.2357      |
| Phosphoenolpyruvate                    | 0.9899         | 0.3926      | Phosphoenolpyruvate      | 0.9437         | 0.3926      |
| β-D-Glucose                            | 0.9863         | 0.0546      | β-D-Glucose              | 0.8564         | 0.0546      |
| Glyce rate 3-phosphate                 | 0.9737         | 0.5651      | Glyce rate3-phosphate    | 0.8957         | 0.5651      |
| β-D-Fructose 6-phosphate               | 0.9653         | 0.4136      | β-D-Fructose 6-phosphate | 0.7164         | 0.4136      |
| α-D-Glucose 6-phosphate                | 0.9664         | 0.3248      | α-D-Glucose 6-phosphate  | 0.9341         | 0.3248      |
| Salicin                                | 0.9484         | 0.2186      | Salicin                  | 0.8175         | 0.2186      |
| Arbutin                                | 0.9661         | 0.3585      | Arbutin                  | 0.7245         | 0.3585      |



**Table S5** The precision of Intra-day and Inter-day of glycolysis metabolites derivatives.

| Glycolysis metabolites<br>( $\mu\text{g mL}^{-1}$ ) | Intra-day (n=6)     |        | Inter-day (n=6)     |        |
|-----------------------------------------------------|---------------------|--------|---------------------|--------|
|                                                     | Mean $\pm$ SD       | RSD(%) | Mean $\pm$ SD       | RSD(%) |
| Pyruvate                                            | 140.545 $\pm$ 2.425 | 1.73   | 154.336 $\pm$ 8.040 | 5.21   |
| Lactate                                             | 114.466 $\pm$ 4.688 | 4.10   | 117.725 $\pm$ 5.083 | 4.32   |
| Oxoacetic acid                                      | 25.885 $\pm$ 0.226  | 0.87   | 25.176 $\pm$ 0.511  | 2.03   |
| Phosphoenolpyruvate                                 | 0.051 $\pm$ 0.002   | 3.81   | 0.050 $\pm$ 0.002   | 3.53   |
| $\beta$ -D-Glucose                                  | 0.133 $\pm$ 0.002   | 1.20   | 0.140 $\pm$ 0.006   | 4.40   |
| Glyceraldehyde 3-phosphate                          | 0.042 $\pm$ 0.006   | 13.67  | 0.039 $\pm$ 0.005   | 12.01  |
| $\beta$ -D-Fructose 6-phosphate                     | 0.053 $\pm$ 0.004   | 6.80   | 0.053 $\pm$ 0.003   | 4.88   |
| $\alpha$ -D-Glucose 6-phosphate                     | 0.055 $\pm$ 0.003   | 5.12   | 0.051 $\pm$ 0.006   | 10.73  |
| Salicin                                             | 2.183 $\pm$ 0.096   | 4.41   | 2.107 $\pm$ 0.112   | 5.32   |
| Arbutin                                             | 0.064 $\pm$ 0.005   | 7.74   | 0.057 $\pm$ 0.004   | 7.29   |

**Table S6** The stability of glycolysis metabolites derivatives at different temperature within 3 months.

| Glycolysis metabolites<br>( $\mu\text{g mL}^{-1}$ ) | -20°C (n=3)          |        | -40°C (n=3)          |        | -80°C (n=3)          |        |
|-----------------------------------------------------|----------------------|--------|----------------------|--------|----------------------|--------|
|                                                     | Mean $\pm$ SD        | RSD(%) | Mean $\pm$ SD        | RSD(%) | Mean $\pm$ SD        | RSD(%) |
| Pyruvate                                            | 176.971 $\pm$ 23.196 | 13.11  | 177.867 $\pm$ 35.810 | 20.13  | 168.573 $\pm$ 14.440 | 8.57   |
| Lactate                                             | 196.767 $\pm$ 42.086 | 21.39  | 201.069 $\pm$ 39.958 | 19.87  | 195.340 $\pm$ 22.160 | 11.34  |
| Oxoacetic acid                                      | 35.191 $\pm$ 10.428  | 29.63  | 28.993 $\pm$ 5.803   | 20.02  | 28.604 $\pm$ 5.064   | 17.70  |
| Phosphoenolpyruvate                                 | 0.054 $\pm$ 0.019    | 34.71  | 0.069 $\pm$ 0.010    | 14.64  | 0.063 $\pm$ 0.009    | 14.93  |
| $\beta$ -D-Glucose                                  | 0.281 $\pm$ 0.089    | 31.73  | 0.278 $\pm$ 0.035    | 12.42  | 0.315 $\pm$ 0.053    | 16.94  |
| Glyceraldehyde-3-phosphate                          | 0.039 $\pm$ 0.013    | 34.72  | 0.041 $\pm$ 0.015    | 37.77  | 0.057 $\pm$ 0.007    | 13.03  |
| $\beta$ -D-Fructose-6-phosphate                     | 0.047 $\pm$ 0.015    | 31.54  | 0.042 $\pm$ 0.008    | 18.46  | 0.062 $\pm$ 0.011    | 17.39  |
| $\alpha$ -D-Glucose-6-phosphate                     | 0.103 $\pm$ 0.065    | 63.25  | 0.088 $\pm$ 0.036    | 40.33  | 0.092 $\pm$ 0.019    | 20.50  |
| Salicin                                             | 1.742 $\pm$ 0.452    | 25.92  | 1.841 $\pm$ 0.311    | 16.87  | 1.759 $\pm$ 0.165    | 9.37   |
| Arbutin                                             | 0.059 $\pm$ 0.014    | 23.35  | 0.050 $\pm$ 0.009    | 17.67  | 0.053 $\pm$ 0.008    | 15.58  |

**Table S7** The freeze-thaw stability test for glycolysis metabolites in human serum at -40°C.

| Glycolysis metabolites<br>( $\mu\text{g mL}^{-1}$ ) | Freeze–thaw (6 cycles) |        | Freeze–thaw (5 cycles)  |        | Freeze–thaw (4 cycles) |        |
|-----------------------------------------------------|------------------------|--------|-------------------------|--------|------------------------|--------|
|                                                     | Mean $\pm$ SD          | RSD(%) | Mean $\pm$ SD           | RSD(%) | Mean $\pm$ SD          | RSD(%) |
| Pyruvate                                            | 168.770 $\pm$ 7.881    | 4.67   | 168.881 $\pm$ 8.80<br>6 | 5.22   | 168.068 $\pm$ 9.950    | 5.92   |
| Lactate                                             | 191.293 $\pm$ 5.374    | 2.81   | 191.814 $\pm$ 5.83<br>6 | 3.04   | 191.269 $\pm$ 6.591    | 3.45   |
| Oxoacetic acid                                      | 36.113 $\pm$ 9.833     | 27.23  | 34.056 $\pm$ 9.442      | 27.73  | 30.196 $\pm$ 4.417     | 14.63  |
| Phosphoenolpyruvate                                 | 0.066 $\pm$ 0.011      | 16.61  | 0.064 $\pm$ 0.011       | 17.46  | 0.060 $\pm$ 0.007      | 11.18  |
| $\beta$ -D-Glucose                                  | 0.213 $\pm$ 0.062      | 29.11  | 0.202 $\pm$ 0.061       | 30.49  | 0.174 $\pm$ 0.003      | 1.85   |
| Glyceraldehyde-3-phosphate                          | 0.035 $\pm$ 0.008      | 23.26  | 0.038 $\pm$ 0.006       | 15.51  | 0.036 $\pm$ 0.004      | 12.00  |
| $\beta$ -D-Fructose-6-phosphate                     | 0.037 $\pm$ 0.003      | 9.33   | 0.036 $\pm$ 0.003       | 9.50   | 0.036 $\pm$ 0.004      | 10.69  |
| $\alpha$ -D-Glucose-6-phosphate                     | 0.073 $\pm$ 0.012      | 16.72  | 0.075 $\pm$ 0.013       | 17.04  | 0.072 $\pm$ 0.014      | 18.77  |
| Salicin                                             | 1.325 $\pm$ 0.260      | 19.61  | 1.252 $\pm$ 0.212       | 16.91  | 1.337 $\pm$ 0.111      | 8.33   |
| Arbutin                                             | 0.064 $\pm$ 0.007      | 10.89  | 0.065 $\pm$ 0.007       | 10.17  | 0.064 $\pm$ 0.007      | 11.57  |

**Table S8** Matrix effect results of this protocol.

| Glycolysis metabolites( $\mu\text{g mL}^{-1}$ ) | Low    | Medium | High   |
|-------------------------------------------------|--------|--------|--------|
| Pyruvate                                        | 102.30 | 97.10  | 100.73 |
| Lactate                                         | 110.24 | 118.99 | 111.22 |
| oxaloacetic acid                                | 88.35  | 97.78  | 92.23  |
| Phosphoenolpyruvate                             | 117.76 | 116.89 | 94.32  |
| $\beta$ -D-Glucose                              | 84.22  | 97.08  | 88.65  |
| Glyceraldehyde 3-phosphate                      | 85.18  | 109.40 | 128.38 |
| $\beta$ -D-Fructose 6-phosphate                 | 114.83 | 91.85  | 82.25  |
| $\alpha$ -D-Glucose 6-phosphate                 | 78.58  | 84.66  | 95.31  |
| Salicin                                         | 89.44  | 94.00  | 83.54  |
| Arbutin                                         | 87.52  | 102.33 | 84.63  |

**Table S9** Quantitative analysis of glycolysis metabolites of the two groups (Mean  $\pm$ SD).

| Glycolysis metabolites( $\mu\text{g mL}^{-1}$ ) | Control (n=40)       | Gastric carcinoma (n=40) | P value |
|-------------------------------------------------|----------------------|--------------------------|---------|
| Pyruvate                                        | 155.187 $\pm$ 2.495  | 153.857 $\pm$ 2.410      | 0.017   |
| Lactate                                         | 240.125 $\pm$ 45.300 | 176.514 $\pm$ 42.352     | < 0.001 |
| Oxaloacetic acid                                | 42.427 $\pm$ 11.067  | 44.023 $\pm$ 17.043      | 0.621   |
| Phosphoenolpyruvate                             | 0.032 $\pm$ 0.006    | 0.022 $\pm$ 0.004        | < 0.001 |
| $\beta$ -D-Glucose                              | 0.358 $\pm$ 0.088    | 0.290 $\pm$ 0.045        | < 0.001 |
| Glyceraldehyde 3-phosphate                      | 0.016 $\pm$ 0.005    | 0.010 $\pm$ 0.003        | < 0.001 |
| $\beta$ -D-Fructose 6-phosphate                 | 0.021 $\pm$ 0.006    | 0.012 $\pm$ 0.004        | < 0.001 |
| $\alpha$ -D-Glucose 6-phosphate                 | 0.035 $\pm$ 0.008    | 0.037 $\pm$ 0.011        | 0.212   |
| Salicin                                         | 0.419 $\pm$ 0.106    | 0.231 $\pm$ 0.036        | < 0.001 |
| Arbutin                                         | 0.049 $\pm$ 0.014    | 0.049 $\pm$ 0.013        | 0.903   |
